# Supplementary material for: In-Depth Examination of CIGS (Copper, Indium, Gallium, Selenium) Layer Properties for Enhanced Solar Cell Performance
Source: Research Square preprint supplement (doi:10.21203/rs.3.rs-4694506/v1), 2024-07-30
Supplement: Supplementary file 1 [file 4e50dd1ea8e5133f5d99a174.docx]

**Table 1S.** Parameters used in simulation

| **Parameters** | n-ZnO | n-CdS | p-CIGS | p-Si |
| --- | --- | --- | --- | --- |
| **Bandgap, Eg (eV)** | 3.3 | 2.45 | 1.10 | 1.12 |
| **Electron affinity, χe (eV)** | 4.6 | 4.40 | 4.50 | 4.05 |
| **Dielectric constant** | 9 | 10 | 13.60 | 11.90 |
| **Density of states at conduction band, Nc (cm-3)** | 2.2 1018 | 2.2 1018 | 2.2 1018 | 2.8 1019 |
| **Density of states at valence band, Nc (cm-3)** | 1.8 1019 | 1.8 1019 | 1.8 1019 | 2.65 1019 |
| **Electron mobility μn (cm2/Vs)** | 100 | 100 | 100 | 1450 |
| **Hole mobility μn (cm2/Vs)** | 25 | 25 | 25 | 500 |
| **Electron and hole concentration, n, p (cm-3)** | 1020 | 1020 | 2 1016 | 1020 |
| **Defect density (cm-3)** | 1014 | 1014 | 1014 | 1014 |
